# Supplementary material
Source: MDPI journal article supplement (https://www.mdpi.com/1424-2818/14/9/774)
Supplement: s1 [file s1]

Archive with 2 entries (2 files):
- Supplementary material.pdf
- Supplementay Tables.xlsx
