# Supplementary material
Source: MDPI journal article supplement (https://www.mdpi.com/1424-2818/14/9/774)
Supplement: s1 [file s1 › Supplementay Tables.xlsx]

## Sheet: Table S1
ID	longitude (EPSG:3003)	latitude (EPSG:3003)	bio4	bio5	bio9	bio10	bio12	bio15	bio16	bio17	bio18	elevation (m)	shannon	PC1	PC2	PC3
HAPMAP2_box3_C8_SSWB28M03	1533200	4368564	0.962426	0.803226	0.81505	0.808971	0.21461	0.0681919	0.225597	0.461883	0.521212	357.6	1.11801	-1.20315	2.06958	0.392579
HAPMAP4_box1_A12_SSWB28_M04	1544043	4344051	0.392023	0.893548	0.865652	0.875438	0	0.412607	0	0	0.327273	125.6	0.862692	-3.2471	0.23032	-1.89957
HAPMAP4_box1_B12_SSWB28_F04	1536482	4376701	0.922668	0.903226	0.853002	0.847899	0.213961	0	0.208243	0.502242	0.527273	387.2	0.93674	-1.52204	2.16024	0.463395
HAPMAP4_box1_C12_SSWB28_M05	1536482	4376701	0.922668	0.903226	0.853002	0.847899	0.213961	0	0.208243	0.502242	0.527273	387.2	0.93674	-1.52204	2.16024	0.463395
HAPMAP4_box1_D12_SSWB28_M06	1536482	4376701	0.922668	0.903226	0.853002	0.847899	0.213961	0	0.208243	0.502242	0.527273	387.2	0.93674	-1.52204	2.16024	0.463395
HAPMAP4_box1_E12_SSWB28_U02	1536482	4376701	0.922668	0.903226	0.853002	0.847899	0.213961	0	0.208243	0.502242	0.527273	387.2	0.93674	-1.52204	2.16024	0.463395
HAPMAP4_box1_F12_SSWB28_F05	1537835	4376751	0.839894	0.964516	0.93373	0.928737	0.116883	0.000998463	0.119306	0.304933	0.321212	249.2	0.860467	-2.85196	1.5943	0.147674
HAPMAP4_box1_G11_SSWB28_F02	1480902	4343259	0.801924	0.845161	0.86867	0.860474	0.475974	0.65993	0.454808	0.327354	0.187879	334.6	0.863177	-1.27232	-0.950464	0.970653
HAPMAP4_box1_G12_SSWB28_M07	1537835	4376751	0.839894	0.964516	0.93373	0.928737	0.116883	0.000998463	0.119306	0.304933	0.321212	249.2	0.860467	-2.85196	1.5943	0.147674
HAPMAP4_box1_H11_SSWB28_F03	1483296	4340276	0.748276	0.867742	0.880724	0.874252	0.45	0.584436	0.39624	0.286996	0.145455	290.2	0.641663	-1.63504	-0.904736	0.710921
HAPMAP4_box1_H12_SSWB28_M08	1537835	4376751	0.839894	0.964516	0.93373	0.928737	0.116883	0.000998463	0.119306	0.304933	0.321212	249.2	0.860467	-2.85196	1.5943	0.147674
HAPMAP5_box1_A10_SSWB28_M15	1532046	4448726	0.86603	0.422581	0.484332	0.474841	0.570455	0.257128	0.492408	0.726457	0.49697	652.6	1.04347	2.34728	1.16244	0.0831664
HAPMAP5_box1_A12_SSWB28_M23	1461779	4446840	0.476886	0.53871	0.653613	0.666463	0.769156	0.86339	0.736804	0.600897	0.266667	462.8	0.770055	1.66355	-2.09885	0.24988
HAPMAP5_box1_A8_SSWB28_M12	1554070	4479812	0.699421	0.619355	0.759027	0.75569	0.352273	0.24357	0.329718	0.497758	0.248485	282.8	1.02086	-0.484882	0.42303	-0.15247
HAPMAP5_box1_A9_SSWB28_F09	1490405	4319806	0.44689	0.377419	0.534337	0.543105	0.640584	0.571722	0.551699	0.426009	0.593939	577	0.825439	2.04585	-0.34661	-1.17348
HAPMAP5_box1_B10_SSWB28_M16	1532046	4448726	0.86603	0.422581	0.484332	0.474841	0.570455	0.257128	0.492408	0.726457	0.49697	652.6	1.04347	2.34728	1.16244	0.0831664
HAPMAP5_box1_B11_SSWB28_M20	1496958	4539608	0.163176	0.5	0.571077	0.583829	0.511039	0.556573	0.474331	0.55157	0.290909	361.8	1.1773	1.18072	-1.18887	-1.7598
HAPMAP5_box1_B7_SSWB28_M10	1498786	4485524	0.668222	0.403226	0.463856	0.462877	0.817532	0.770252	0.79248	0.829596	0.49697	637.2	0.802255	3.56881	-0.866035	0.428704
HAPMAP5_box1_B8_SSWB28_U11	1531676	4436336	0.998655	0	0	0	0.851948	0.102818	0.673897	1	1	1238.2	0.348064	6.94413	2.91107	-0.542726
HAPMAP5_box1_B9_SSWB28_U16	1471364	4343980	0.716112	0.806452	0.82349	0.822157	0.555195	0.738208	0.505423	0.331839	0.187879	367.2	0.872814	-0.799496	-1.37466	0.77496
HAPMAP5_box1_C10_SSWB28_M17	1532046	4448726	0.86603	0.422581	0.484332	0.474841	0.570455	0.257128	0.492408	0.726457	0.49697	652.6	1.04347	2.34728	1.16244	0.0831664
HAPMAP5_box1_C11_SSWB28_F16	1496958	4539608	0.163176	0.5	0.571077	0.583829	0.511039	0.556573	0.474331	0.55157	0.290909	361.8	1.1773	1.18072	-1.18887	-1.7598
HAPMAP5_box1_C12_SSWB28_F20	1461779	4446840	0.476886	0.53871	0.653613	0.666463	0.769156	0.86339	0.736804	0.600897	0.266667	462.8	0.770055	1.66355	-2.09885	0.24988
HAPMAP5_box1_C6_SSWB28_U03	1495329	4423215	0.932983	0.767742	0.784942	0.783822	0.568831	0.72653	0.543022	0.493274	0.109091	383.8	0.95272	-0.305762	-1.11068	1.56462
HAPMAP5_box1_D10_SSWB28_F12	1532046	4448726	0.86603	0.422581	0.484332	0.474841	0.570455	0.257128	0.492408	0.726457	0.49697	652.6	1.04347	2.34728	1.16244	0.0831664
HAPMAP5_box1_D12_SSWB28_M25	1461779	4446840	0.476886	0.53871	0.653613	0.666463	0.769156	0.86339	0.736804	0.600897	0.266667	462.8	0.770055	1.66355	-2.09885	0.24988
HAPMAP5_box1_D6_SSWB28_U04	1461779	4446840	0.476886	0.53871	0.653613	0.666463	0.769156	0.86339	0.736804	0.600897	0.266667	462.8	0.770055	1.66355	-2.09885	0.24988
HAPMAP5_box1_D7_SSWB28_U08	1500190	4472599	0.789932	0.380645	0.30784	0.313777	0.944156	0.637917	0.866233	0.932735	0.69697	750	0.91569	4.95845	0.0139866	0.628293
HAPMAP5_box1_D8_SSWB28_M14	1473865	4364774	0.678158	0.580645	0.663245	0.661074	0.650974	0.70231	0.652205	0.524664	0.442424	526	0.881931	1.31541	-0.817973	0.40796
HAPMAP5_box1_E10_SSWB28_F13	1496958	4539608	0.163176	0.5	0.571077	0.583829	0.511039	0.556573	0.474331	0.55157	0.290909	361.8	1.1773	1.18072	-1.18887	-1.7598
HAPMAP5_box1_E11_SSWB28_F17	1496958	4539608	0.163176	0.5	0.571077	0.583829	0.511039	0.556573	0.474331	0.55157	0.290909	361.8	1.1773	1.18072	-1.18887	-1.7598
HAPMAP5_box1_E6_SSWB28_U05	1461779	4446840	0.476886	0.53871	0.653613	0.666463	0.769156	0.86339	0.736804	0.600897	0.266667	462.8	0.770055	1.66355	-2.09885	0.24988
HAPMAP5_box1_E8_SSWB28_U12	1531432	4548877	0.537005	0.770968	0.919272	0.915569	0.268831	0.492063	0.283442	0.372197	0.0242424	102.2	1.0381	-2.08763	-0.941484	-0.191468
HAPMAP5_box1_F10_SSWB28_M18	1496958	4539608	0.163176	0.5	0.571077	0.583829	0.511039	0.556573	0.474331	0.55157	0.290909	361.8	1.1773	1.18072	-1.18887	-1.7598
HAPMAP5_box1_F11_SSWB28_M22	1461779	4446840	0.476886	0.53871	0.653613	0.666463	0.769156	0.86339	0.736804	0.600897	0.266667	462.8	0.770055	1.66355	-2.09885	0.24988
HAPMAP5_box1_F12_SSWB28_F22	1461779	4446840	0.476886	0.53871	0.653613	0.666463	0.769156	0.86339	0.736804	0.600897	0.266667	462.8	0.770055	1.66355	-2.09885	0.24988
HAPMAP5_box1_F6_SSWB28_U06	1471842	4446079	0.635616	0.464516	0.377706	0.387429	1	1	1	0.825112	0.575758	606.2	0.736533	4.5271	-1.65928	0.762083
HAPMAP5_box1_F8_SSWB28_U13	1499261	4516252	0.398272	0.5	0.634944	0.634721	0.567532	0.553539	0.484454	0.542601	0.230303	343.8	0.885903	0.945932	-1.07702	-0.824414
HAPMAP5_box1_F9_SSWB28_U19	1531774	4387059	0.967678	0.970968	0.940362	0.931126	0.171753	0.0899475	0.184382	0.363229	0.272727	265	0.787362	-2.6419	1.38082	0.819342
HAPMAP5_box1_G10_SSWB28_M19	1496958	4539608	0.163176	0.5	0.571077	0.583829	0.511039	0.556573	0.474331	0.55157	0.290909	361.8	1.1773	1.18072	-1.18887	-1.7598
HAPMAP5_box1_G12_SSWB28_M26	1532046	4448726	0.86603	0.422581	0.484332	0.474841	0.570455	0.257128	0.492408	0.726457	0.49697	652.6	1.04347	2.34728	1.16244	0.0831664
HAPMAP5_box1_G7_SSWB28_U09	1454926	4480873	0.494589	0.567742	0.455416	0.469452	0.903571	0.908758	0.87274	0.757848	0.412121	518.6	1.04565	3.31826	-1.90787	0.338639
HAPMAP5_box1_G8_SSWB28_U14	1479411	4438249	0.859812	0.835484	0.806629	0.812564	0.612987	0.893032	0.624006	0.479821	0.0787879	299.2	1.21778	-0.375993	-1.85013	1.70644
HAPMAP5_box1_G9_SSWB28_U20	1532046	4448726	0.86603	0.422581	0.484332	0.474841	0.570455	0.257128	0.492408	0.726457	0.49697	652.6	1.04347	2.34728	1.16244	0.0831664
HAPMAP5_box1_H10_SSWB28_F14	1496958	4539608	0.163176	0.5	0.571077	0.583829	0.511039	0.556573	0.474331	0.55157	0.290909	361.8	1.1773	1.18072	-1.18887	-1.7598
HAPMAP5_box1_H11_SSWB28_F19	1461779	4446840	0.476886	0.53871	0.653613	0.666463	0.769156	0.86339	0.736804	0.600897	0.266667	462.8	0.770055	1.66355	-2.09885	0.24988
HAPMAP5_box1_H12_SSWB28_M27	1532046	4448726	0.86603	0.422581	0.484332	0.474841	0.570455	0.257128	0.492408	0.726457	0.49697	652.6	1.04347	2.34728	1.16244	0.0831664
HAPMAP5_box1_H7_SSWB28_U10	1536914	4425780	0.975763	0.312903	0.355423	0.348501	0.611039	0.0145557	0.506869	0.865471	0.781818	861.8	0.869608	3.71581	2.63826	-0.0336986
HAPMAP5_box1_H8_SSWB28_U15	1495702	4326735	0.513843	0.8	0.835544	0.840714	0.378247	0.497562	0.353579	0.251121	0.30303	254.8	0.255479	-1.39995	-0.58024	-0.454172
HAPMAP5_box1_H9_SSWB28_F11	1532046	4448726	0.86603	0.422581	0.484332	0.474841	0.570455	0.257128	0.492408	0.726457	0.49697	652.6	1.04347	2.34728	1.16244	0.0831664
HAPMAP5_box2_A1_SSWB28_F23	1532046	4448726	0.86603	0.422581	0.484332	0.474841	0.570455	0.257128	0.492408	0.726457	0.49697	652.6	1.04347	2.34728	1.16244	0.0831664
HAPMAP5_box2_A4_SSWB28_F28	1533200	4368564	0.962426	0.803226	0.81505	0.808971	0.21461	0.0681919	0.225597	0.461883	0.521212	357.6	1.11801	-1.20315	2.06958	0.392579
HAPMAP5_box2_A5_SSWB28_F32	1483296	4340276	0.748276	0.867742	0.880724	0.874252	0.45	0.584436	0.39624	0.286996	0.145455	290.2	0.641663	-1.63504	-0.904736	0.710921
HAPMAP5_box2_A6_SSWB28_M45	1478744	4358571	0.900914	1	1	0.992204	0.42987	0.709627	0.44107	0.282511	0.0969697	192	1.18988	-2.39508	-1.18927	1.68304
HAPMAP5_box2_B1_SSWB28_M28	1544043	4344051	0.392023	0.893548	0.865652	0.875438	0	0.412607	0	0	0.327273	125.6	0.860849	-3.2471	0.23032	-1.89957
HAPMAP5_box2_B4_SSWB28_F29	1533200	4368564	0.962426	0.803226	0.81505	0.808971	0.21461	0.0681919	0.225597	0.461883	0.521212	357.6	1.11801	-1.20315	2.06958	0.392579
HAPMAP5_box2_B6_SSWB28_F35	1478744	4358571	0.900914	1	1	0.992204	0.42987	0.709627	0.44107	0.282511	0.0969697	192	1.18988	-2.39508	-1.18927	1.68304
HAPMAP5_box2_C1_SSWB28_F24	1544043	4344051	0.392023	0.893548	0.865652	0.875438	0	0.412607	0	0	0.327273	125.6	0.862692	-3.2471	0.23032	-1.89957
HAPMAP5_box2_C3_SSWB28_U21	1483296	4340276	0.748276	0.867742	0.880724	0.874252	0.45	0.584436	0.39624	0.286996	0.145455	290.2	0.641663	-1.63504	-0.904736	0.710921
HAPMAP5_box2_C4_SSWB28_F30	1533200	4368564	0.962426	0.803226	0.81505	0.808971	0.21461	0.0681919	0.225597	0.461883	0.521212	357.6	1.11801	-1.20315	2.06958	0.392579
HAPMAP5_box2_C5_SSWB28_M40	1469757	4319088	0.469798	0.93871	0.994578	1	0.473052	0.882486	0.429501	0.134529	0	147.6	0.469099	-2.57042	-2.59424	0.330717
HAPMAP5_box2_C6_SSWB28_M46	1478744	4358571	0.900914	1	1	0.992204	0.42987	0.709627	0.44107	0.282511	0.0969697	192	1.18988	-2.39508	-1.18927	1.68304
HAPMAP5_box2_D4_SSWB28_M36	1533200	4368564	0.962426	0.803226	0.81505	0.808971	0.21461	0.0681919	0.225597	0.461883	0.521212	357.6	1.11801	-1.20315	2.06958	0.392579
HAPMAP5_box2_D5_SSWB28_F34	1478399	4315869	0.597804	0.864516	0.851809	0.856288	0.538312	0.78973	0.47867	0.2287	0.2	275.8	1.11236	-1.26041	-1.68375	0.404955
HAPMAP5_box2_D6_SSWB28_U22	1526257	4357022	0.8538	0.467742	0.489157	0.48862	0.57013	0.18534	0.469993	0.704036	0.890909	789.4	0.979172	2.60938	2.20264	-0.192886
HAPMAP5_box2_E1_SSWB28_F26	1544043	4344051	0.392023	0.893548	0.865652	0.875438	0	0.412607	0	0	0.327273	125.6	0.860849	-3.2471	0.23032	-1.89957
HAPMAP5_box2_E3_SSWB28_M33	1522734	4389761	1	0.829032	0.825894	0.822157	0.331169	0.237143	0.326103	0.556054	0.393939	404.6	0.921613	-0.931742	1.24848	1.06625
HAPMAP5_box2_E4_SSWB28_M37	1533200	4368564	0.962426	0.803226	0.81505	0.808971	0.21461	0.0681919	0.225597	0.461883	0.521212	357.6	1.11801	-1.20315	2.06958	0.392579
HAPMAP5_box2_E5_SSWB28_M41	1469757	4319088	0.469798	0.93871	0.994578	1	0.473052	0.882486	0.429501	0.134529	0	147.6	0.427032	-2.57042	-2.59424	0.330717
HAPMAP5_box2_E6_SSWB28_U23	1526257	4357022	0.8538	0.467742	0.489157	0.48862	0.57013	0.18534	0.469993	0.704036	0.890909	789.4	0.979172	2.60938	2.20264	-0.192886
HAPMAP5_box2_F1_SSWB28_F29	1544043	4344051	0.392023	0.893548	0.865652	0.875438	0	0.412607	0	0	0.327273	125.6	0.862692	-3.2471	0.23032	-1.89957
HAPMAP5_box2_F4_SSWB28_M38	1533200	4368564	0.962426	0.803226	0.81505	0.808971	0.21461	0.0681919	0.225597	0.461883	0.521212	357.6	1.11801	-1.20315	2.06958	0.392579
HAPMAP5_box2_F5_SSWB28_M42	1478399	4315869	0.597804	0.864516	0.851809	0.856288	0.538312	0.78973	0.47867	0.2287	0.2	275.8	1.11236	-1.26041	-1.68375	0.404955
HAPMAP5_box2_F6_SSWB28_U24	1526257	4357022	0.8538	0.467742	0.489157	0.48862	0.57013	0.18534	0.469993	0.704036	0.890909	789.4	0.979172	2.60938	2.20264	-0.192886
HAPMAP5_box2_G1_SSWB28_M30	1544043	4344051	0.392023	0.893548	0.865652	0.875438	0	0.412607	0	0	0.327273	125.6	0.860849	-3.2471	0.23032	-1.89957
HAPMAP5_box2_G3_SSWB28_M35	1522734	4389761	1	0.829032	0.825894	0.822157	0.331169	0.237143	0.326103	0.556054	0.393939	404.6	0.921613	-0.931742	1.24848	1.06625
HAPMAP5_box2_G5_SSWB28_M43	1478399	4315869	0.597804	0.864516	0.851809	0.856288	0.538312	0.78973	0.47867	0.2287	0.2	275.8	1.11236	-1.26041	-1.68375	0.404955
HAPMAP5_box2_H1_SSWB28_M31	1544043	4344051	0.392023	0.893548	0.865652	0.875438	0	0.412607	0	0	0.327273	125.6	0.860849	-3.2471	0.23032	-1.89957
HAPMAP5_box2_H3_SSWB28_F27	1522734	4389761	1	0.829032	0.825894	0.822157	0.331169	0.237143	0.326103	0.556054	0.393939	404.6	0.921613	-0.931742	1.24848	1.06625
HAPMAP5_box2_H4_SSWB28_M39	1483296	4340276	0.748276	0.867742	0.880724	0.874252	0.45	0.584436	0.39624	0.286996	0.145455	290.2	0.641663	-1.63504	-0.904736	0.710921
HAPMAP5_box2_H5_SSWB28_M44	1478399	4315869	0.597804	0.864516	0.851809	0.856288	0.538312	0.78973	0.47867	0.2287	0.2	275.8	1.11236	-1.26041	-1.68375	0.404955

## Sheet: Table S2
SNP	Chromosome	Position (bp)	Outlier in pcadapt? / associated PC	Outlier in lfmm? / associated variable	Outlier in rda? / associated variable	Annotation
ASGA0002403	1	38297216	no	yes / pc1	yes / pc1	intron_variant
H3GA0000123	1	2073186	no	yes / pc1	yes / pc1	upstream_gene_variant
ALGA0122311	1	255950427	no	yes / pc1	yes / pc1	intron_variant
ALGA0107475	2	145362058	no	yes / pc3	yes / pc3	intergenic_region
MARC0095742	2	36484824	no	yes / pc2	yes / pc2	intergenic_region
DBWU0000054	2	140868878	no	yes / pc1	yes / pc1	synonymous_variant
H3GA0006522	2	36921856	no	yes / pc3	yes / pc3	intergenic_region
INRA0010988	3	83656607	no	yes / pc2	yes / pc2	intron_variant
ALGA0026686	4	90378144	yes / pc2	yes / pc2	no	intron_variant
H3GA0014976	4	129987443	no	yes / pc3	yes / pc3	intron_variant
M1GA0007033	4	1055860	no	yes / pc2	yes / pc2	intron_variant
*CASI0009814	4	125507035	no	yes / pc2	yes / pc2	intergenic_region
ALGA0030800	5	14866967	yes / pc2	yes / pc2	yes / pc2	intergenic_region
ASGA0025965	5	65943570	no	yes / pc1	yes / pc1	3_prime_UTR_variant
ALGA0033592	5	91974558	no	yes / pc1	yes / pc1	intron_variant
ASGA0034794	6	41688374	yes / pc2	yes / pc2	no	intergenic_region
ALGA0124407	6	29753021	no	yes / pc1	yes / pc1	intergenic_region
H3GA0022180	7	82854597	yes / pc2	yes / pc2	no	intergenic_region
ALGA0042436	7	65752350	no	yes / pc1	yes / pc1	intron_variant
ALGA0049543	8	124919219	yes / pc2	yes / pc2	no	intergenic_region
MARC0036945	9	108850813	yes / pc2	yes / pc2	yes / pc2	intron_variant
DIAS0000307	9	49808248	yes / pc2	yes / shannon	no	intron_variant
ASGA0084646	9	60623732	no	yes / pc3	yes / pc3	intron_variant
ALGA0055182	9	124846793	no	yes / pc2	yes / pc2	upstream_gene_variant
ASGA0052177	11	75918345	no	yes / pc1	yes / pc1	intron_variant
M1GA0014824	11	6482400	no	yes / pc1	yes / pc1	intron_variant
ALGA0120747	12	6655483	yes / pc2	yes / shannon	no	intergenic_region
ALGA0066222	12	35716518	no	yes / pc3	yes / pc3	intergenic_region
INRA0041163	13	151822909	no	yes / pc3	yes / pc3	intron_variant
DIAS0004292	13	79404499	no	yes / pc2	yes / pc2	missense_variant
ALGA0073288	13	184684216	no	yes / pc2	yes / pc2	upstream_gene_variant
DIAS0000100	13	83228572	no	yes / pc2	yes / pc2	intron_variant
ASGA0059130	13	148158909	no	yes / pc1	yes / pc1	downstream_gene_variant
ALGA0081112	14	111869403	yes / pc2	no	yes / pc2	intron_variant
MARC0055325	14	82379333	no	yes / pc1	yes / pc1	5_prime_UTR_variant
MARC0067197	15	17253366	no	yes / pc2	yes / pc2	intergenic_region
DRGA0015302	15	100213837	no	yes / shannon	yes / pc1	intergenic_region
ASGA0070290	15	107543885	no	yes / pc2	yes / pc2	downstream_gene_variant
ALGA0086328	15	87043469	no	yes / pc3	yes / pc3	intron_variant
ALGA0086273	15	84153385	no	yes / pc3	yes / pc3	upstream_gene_variant
ASGA0069321	15	33702453	no	yes / pc1	yes / pc1	intergenic_region
ALGA0086212	15	82530888	no	yes / pc1	yes / pc1	intergenic_region
ALGA0090686	16	48269199	no	yes / pc3	yes / pc3	intergenic_region
ASGA0073294	16	45452955	no	yes / pc1	yes / pc1	intron_variant
ASGA0092813	16	21132510	no	yes / pc1	yes / pc1	intron_variant
ALGA0091354	16	65880308	no	yes / pc3	yes / pc3	intron_variant
ALGA0089079	16	10667670	no	yes / pc2	yes / pc2	intergenic_region
ALGA0121030	17	36591637	yes / pc1	yes / pc1	no	intron_variant
H3GA0049205	17	47335083	no	yes / pc1	yes / pc1	intron_variant
* Sscrofa10.2 assembly

## Sheet: Table S3
SNP	Chromosome	Gene	Start_gene	Stop_gene	Function
ASGA0002403	1	NKAIN2	38014254	39039841	sodium/potassium transporting ATPase interacting 2
H3GA0000123	1	CEP43	2086925	2120778	centrosomal protein 43
ALGA0122311	1	.	.	.	.
ALGA0107475	2	.	.	.	.
MARC0095742	2	.	.	.	.
DBWU0000054	2	CTNNA1	140682371	140871334	catenin alpha 1
DBWU0000054	2	SIL1	140878070	141118059	SIL1 nucleotide exchange factor
H3GA0006522	2	FANCF	36884726	36885856	FA complementation group F
H3GA0006522	2	GAS2	36711609	36885620	growth arrest specific 2
INRA0010988	3	.	.	.	.
ALGA0026686	4	IGSF8	90370235	90401376	immunoglobulin superfamily member 8
ALGA0026686	4	KCNJ9	90397850	90430160	potassium inwardly rectifying channel subfamily J member 9
ALGA0026686	4	ATP1A4	90291344	90396160	ATPase Na+/K+ transporting subunit alpha 2
ALGA0026686	4	KCNJ10	90422025	90457407	potassium inwardly rectifying channel subfamily J member 10
H3GA0014976	4	.	.	.	.
M1GA0007033	4	MAFA	1091263	1092818	MAF bZIP transcription factor A
M1GA0007033	4	ZC3H3	1010638	1089738	zinc finger CCCH-type containing 3
ALGA0030800	5	TEX49	14812164	14833965	testis expressed 49
ALGA0030800	5	ADCY6	14834426	14850728	adenylate cyclase 6
ALGA0030800	5	CACNB3	14874238	14888224	calcium voltage-gated channel auxiliary subunit beta 3
ALGA0030800	5	DDX23	14888953	14899174	DEAD-box helicase 23
ALGA0030800	5	RND1	14914642	14937020	Rho family GTPase 1
ASGA0025965	5	RAD51AP1	65872281	65897215	RAD51 associated protein 1
ASGA0025965	5	FGF6	65975838	65990035	fibroblast growth factor 6
ASGA0025965	5	C12orf4	65897541	65944185	chromosome 5 C12orf4 homolog
ALGA0033592	5	.	.	.	.
ASGA0034794	6	.	.	.	.
ALGA0124407	6	.	.	.	.
H3GA0022180	7	.	.	.	.
ALGA0042436	7	.	.	.	.
ALGA0049543	8	.	.	.	.
MARC0036945	9	AMPH	108799793	108971668	amphiphysin
DIAS0000307	9	JHY	49826501	49888860	junctional cadherin complex regulator
DIAS0000307	9	UBASH3B	49630793	49770923	ubiquitin associated and SH3 domain containing B
DIAS0000307	9	CRTAM	49783731	49811313	cytotoxic and regulatory T cell molecule
ASGA0084646	9	JAM3	60613400	60738924	junctional adhesion molecule 3
ALGA0055182	9	ARPC5	124837773	124848108	actin related protein 2/3 complex subunit 5
ALGA0055182	9	APOBEC4	124857402	124863902	apolipoprotein B mRNA editing enzyme catalytic polypeptide like 4
ALGA0055182	9	RGL1	124848337	125144253	ral guanine nucleotide dissociation stimulator like 1
ALGA0055182	9	NCF2	124773498	124812928	neutrophil cytosolic factor 2
ASGA0052177	11	.	.	.	.
M1GA0014824	11	MTUS2	5953753	6532959	microtubule associated scaffold protein 2
ALGA0120747	12	CD300LB	6637642	6647967	CD300 molecule like family member b
ALGA0120747	12	CD300C	6632117	6637555	CD300c molecule
ALGA0120747	12	GPRC5C	6694282	6716239	G protein-coupled receptor class C group 5 member C
ALGA0066222	12	.	.	.	.
INRA0041163	13	BBX	151722085	152005073	BBX high mobility group box domain containing
DIAS0004292	13	FAIM	79397319	79411913	Fas apoptotic inhibitory molecule
DIAS0004292	13	PIK3CB	79425812	79610840	phosphatidylinositol-4,5-bisphosphate 3-kinase catalytic subunit beta
ALGA0073288	13	U6	184687224	184687325	U6 spliceosomal RNA
DIAS0000100	13	ATR	83174824	83289923	ATR serine/threonine kinase
ASGA0059130	13	ZBED2	148156549	148158766	zinc finger BED-type containing 2
ASGA0059130	13	CD96	148090629	148192231	CD96 molecule
ALGA0081112	14	PAX2	111834168	111914304	paired box 2
MARC0055325	14	TSPAN14	82305714	82364661	tetraspanin 14
MARC0055325	14	SH2D4B	82379176	82467221	SH2 domain containing 4B
MARC0067197	15	TMEM163	17262138	17543398	transmembrane protein 163
DRGA0015302	15	.	.	.	.
ASGA0070290	15	.	.	.	.
ALGA0086328	15	ITGA4	86947021	87029777	integrin subunit alpha 4
ALGA0086328	15	CERKL	87025615	87159566	ceramide kinase like
ALGA0086273	15	PJVK	84157419	84165438	pejvakin
ALGA0086273	15	FKBP7	84166897	84182803	FKBP prolyl isomerase 7
ALGA0086273	15	PLEKHA3	84184998	84212119	pleckstrin homology domain containing A3
ALGA0086273	15	PRKRA	84133679	84156508	protein activator of interferon induced protein kinase EIF2AK2
ASGA0069321	15	.	.	.	.
ALGA0086212	15	.	.	.	.
ALGA0090686	16	.	.	.	.
ASGA0073294	16	MAST4	44972826	45561352	microtubule associated serine/threonine kinase family member 4
ASGA0092813	16	SPEF2	21088292	21264853	sperm flagellar 2
ALGA0091354	16	CYFIP2	65852588	66001559	cytoplasmic FMR1 interacting protein 2
ALGA0089079	16	.	.	.	.
ALGA0121030	17	BPIFB2	36531402	36553404	BPI fold containing family B member 2
ALGA0121030	17	BPIFB3	36582591	36602149	BPI fold containing family B member 3
ALGA0121030	17	BPIFB4	36588266	36639034	BPI fold containing family B member 4
ALGA0121030	17	BPIFB6	36556406	36574862	BPI fold containing family B member 6
H3GA0049205	17	PABPC1L	47321380	47351106	poly(A) binding protein cytoplasmic 1 like
H3GA0049205	17	TOMM34	47352144	47376503	translocase of outer mitochondrial membrane 34
H3GA0049205	17	YWHAB	47298015	47319275	tyrosine 3-monooxygenase/tryptophan 5-monooxygenase activation protein beta
H3GA0049205	17	STK4	47376115	47475718	serine/threonine kinase 4

## Sheet: Table S4
Source	Term name	Term ID	Adjusted p-value	Intersections
GO:BP	localization of cell	GO:0051674	0.0278892	CEP43,PIK3CB,ITGA4,SPEF2,STK4,CTNNA1,ATP1A4,RND1,JAM3,ARPC5,CRTAM
GO:BP	cell motility	GO:0048870	0.0278892	CEP43,PIK3CB,ITGA4,SPEF2,STK4,CTNNA1,ATP1A4,RND1,JAM3,ARPC5,CRTAM
GO:BP	localization	GO:0051179	0.0278892	NKAIN2,CEP43,PIK3CB,ATR,TSPAN14,ITGA4,SPEF2,YWHAB,PABPC1L,TOMM34,STK4,CTNNA1,ATP1A4,MAFA,KCNJ9,KCNJ10,CACNB3,RND1,JAM3,UBASH3B,NCF2,ARPC5,CRTAM,JHY
GO:BP	developmental process	GO:0032502	0.0278892	BBX,FAIM,PIK3CB,ATR,ZBED2,PAX2,PRKRA,PJVK,ITGA4,CYFIP2,SPEF2,PABPC1L,STK4,GAS2,CTNNA1,ATP1A4,KCNJ10,RND1,FGF6,JAM3,UBASH3B,CRTAM,JHY
GO:BP	cell adhesion	GO:0007155	0.0278892	PIK3CB,CD96,ITGA4,CYFIP2,STK4,CTNNA1,RND1,JAM3,UBASH3B,CRTAM
GO:BP	biological adhesion	GO:0022610	0.0278892	PIK3CB,CD96,ITGA4,CYFIP2,STK4,CTNNA1,RND1,JAM3,UBASH3B,CRTAM
GO:BP	anatomical structure development	GO:0048856	0.0317599	BBX,FAIM,PIK3CB,ZBED2,PAX2,PRKRA,PJVK,ITGA4,CYFIP2,SPEF2,PABPC1L,STK4,GAS2,CTNNA1,KCNJ10,RND1,FGF6,JAM3,UBASH3B,CRTAM,JHY
GO:BP	cellular developmental process	GO:0048869	0.0317599	FAIM,ATR,ZBED2,PJVK,ITGA4,CYFIP2,SPEF2,PABPC1L,STK4,CTNNA1,KCNJ10,RND1,FGF6,JAM3,UBASH3B,CRTAM,JHY
GO:BP	movement of cell or subcellular component	GO:0006928	0.0317599	CEP43,PIK3CB,ITGA4,SPEF2,STK4,CTNNA1,ATP1A4,RND1,JAM3,ARPC5,CRTAM,JHY
GO:BP	regulation of response to stimulus	GO:0048583	0.0317599	FAIM,PIK3CB,ATR,CD96,TSPAN14,PRKRA,CYFIP2,YWHAB,STK4,GAS2,CTNNA1,ZC3H3,CACNB3,RAD51AP1,JAM3,UBASH3B,CRTAM
GO:BP	locomotion	GO:0040011	0.0363713	CEP43,PIK3CB,ITGA4,SPEF2,STK4,CTNNA1,ATP1A4,RND1,JAM3,ARPC5,CRTAM
GO:BP	system development	GO:0048731	0.0465153	BBX,FAIM,PIK3CB,ZBED2,PAX2,PRKRA,PJVK,CYFIP2,STK4,GAS2,CTNNA1,KCNJ10,RND1,FGF6,JAM3,UBASH3B,CRTAM,JHY
GO:BP	establishment or maintenance of cell polarity	GO:0007163	0.0465153	CTNNA1,RND1,JAM3,CRTAM
GO:BP	neutrophil homeostasis	GO:0001780	0.0465153	PIK3CB,JAM3
GO:BP	cell-substrate adhesion	GO:0031589	0.0465153	PIK3CB,CD96,ITGA4,STK4,JAM3
GO:BP	multicellular organism development	GO:0007275	0.0465153	BBX,FAIM,PIK3CB,ZBED2,PAX2,PRKRA,PJVK,ITGA4,CYFIP2,STK4,GAS2,CTNNA1,KCNJ10,RND1,FGF6,JAM3,UBASH3B,CRTAM,JHY
GO:BP	cell differentiation	GO:0030154	0.0480187	FAIM,ZBED2,PJVK,ITGA4,CYFIP2,SPEF2,PABPC1L,STK4,CTNNA1,KCNJ10,RND1,FGF6,JAM3,UBASH3B,CRTAM,JHY
